# Supplementary material for: Molecular-scale investigation on the photochemical transformation of dissolved organic matter after immobilization by iron minerals with FT-ICR MS
Source: Royal Society of Chemistry journal article supplement (doi:10.1039/d4em00288a), 2024-01-01
Supplement: d4em00288a1.pdf [file d4em00288a1.pdf]

1 **Supplementary Materials**

2           Molecular-scale investigation on the photochemical  
3 transformation of dissolved organic matter after immobilization  
4           by iron minerals with FT-ICR MS

5 Yongcan Jiang <sup>a,b,†</sup>, Yi Wang <sup>c,†</sup>, Yinlong Shao <sup>a</sup>, Dong Yang <sup>a</sup>, Minli Guo <sup>c</sup>, Yu Wen <sup>a</sup>,  
6           Hong Tang <sup>a</sup>, Guanglong Liu <sup>c,\*</sup>

7  
8 **Affiliation**

9           <sup>a</sup> PowerChina Huadong Engineering Corporation Ltd., Hangzhou 311122,  
10 Zhejiang Province, China;

11           <sup>b</sup> Institute of Soil and Water Resources and Environmental Science, College of  
12 Environmental and Resource Sciences, Zhejiang University, HangZhou 310058,  
13 Zhejiang Province, China;

14           <sup>c</sup> Key Laboratory of Arable Land Conservation (Middle and Lower Reaches of  
15 Yangtze River), Ministry of Agriculture and Rural Affairs, College of Resources and  
16 Environment, Huazhong Agricultural University, Wuhan 430070, China.

17  
18 \*Corresponding author.

19 † These authors contributed equally to this work and share first authorship

20 *E-mail addresses:* [liugl@mail.hzau.edu.cn](mailto:liugl@mail.hzau.edu.cn) (Guanglong Liu).

21

22

23 Text S1 FT-ICR MS data processing

24 Molecular formulas containing the elements C, H, O, N, and S were performed  
25 according to basic chemical standards using in-house software. The molecular  
26 parameters ( $m/z$ , H/C, O/C, etc.), derived from peak formula assignments were  
27 expressed as intensity-weighted average (wa) values. Therefore, these values directly  
28 reflected the relative contribution of each  $m/z$  peak to the entire DOM mass spectrum.  
29 The modified aromaticity index (AI), the double bond equivalent (DBE) and Kendrick  
30 quality defect (KMD) were calculated for each assigned molecular formula.

31 Van Krevelen diagrams was used to distinguish compound classes in samples on  
32 the basis of O/C and H/C plots. According to van Krevelen diagrams, compounds were  
33 classified into seven categories by elemental ratios: (1) lipids (H:C = 1.5-2.0; O:C = 0-  
34 0.3); (2) proteins (H:C = 1.5-2.2; O:C = 0.3-0.67); (3) carbohydrates (H:C = 1.5-2.0;  
35 O:C = 0.67-1.2); (4) unsaturated hydrocarbons (H:C = 0.7-1.0; O:C = 0-0.1); (5) lignins  
36 (H:C = 0.7-1.5; O:C = 0.1-0.67); (6) condensed aromatic structures (H:C = 0.2-0.7; O:C  
37 = 0-0.67); and (7) tannin (H:C = 0.5-1.5; O:C = 0.67-1.2). To accurately describe the  
38 impact of mineral types on DOM adsorption and photochemical transformation  
39 processes. In the analysis of adsorption data, van Krevelen diagrams mainly display the  
40 DOM molecules in the solution after adsorption. In case of photochemical degradation,  
41 van Krevelen diagrams mainly demonstrate the DOM molecules DOM molecules  
42 eluted from iron oxyhydroxides.

43

44

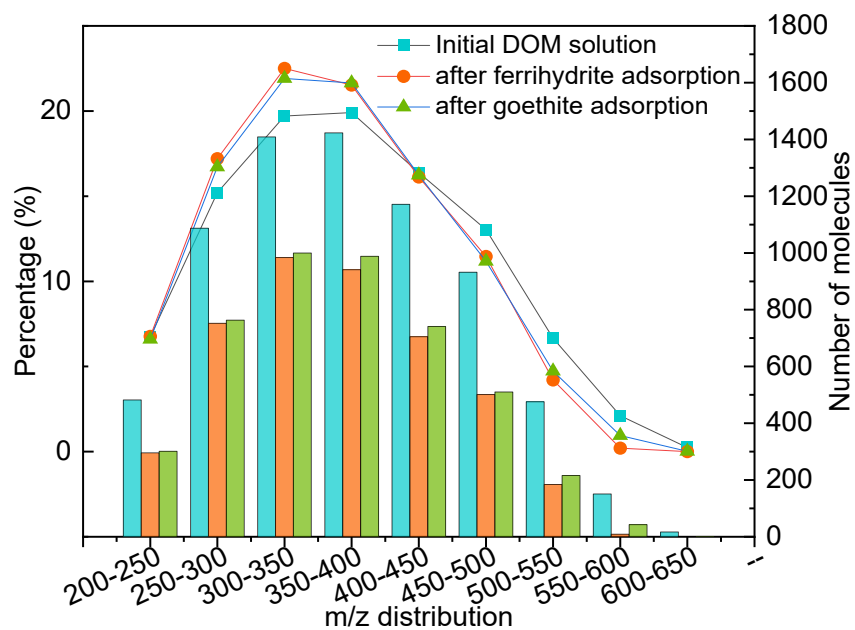

45

46 **Fig. S1.** Mass distribution (the bar graph on the right) and percentage content (The line  
 47 chart on the left) of DOM species in initial solution and residual after adsorption by  
 48 ferrihydrite and goethite.

49

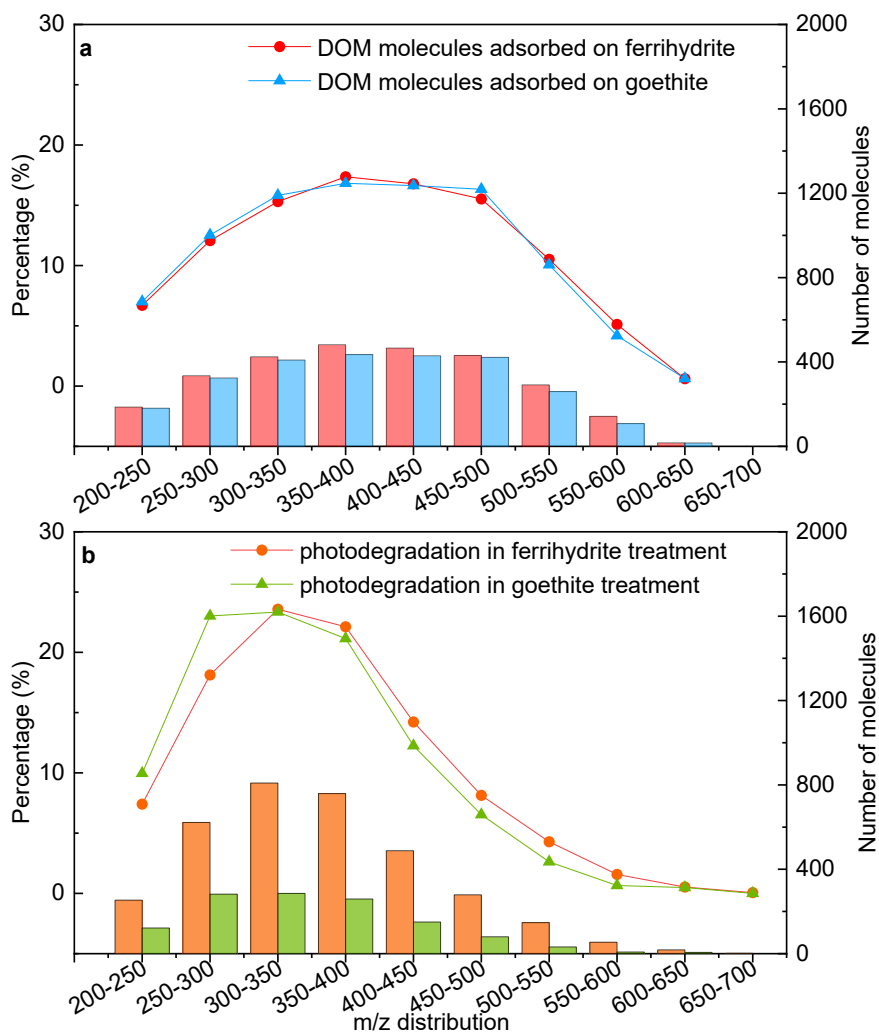

50  
 51 **Fig. S2.** The molecular weight distribution (bar chart on the right) and percentage  
 52 content (line chart on the left) of DOM (a) adsorbed by ferrihydrite and goethite and  
 53 DOM (b) photodegradation after adsorption.

54

55 Table S1 Intensity-weighted average molecular parameters and the number of formulas  
56 of DOM derived from assigned molecular formulas.

| parameters             | Initial DOM<br>solution | after ferrihydrite<br>adsorption | after goethite<br>adsorption |
|------------------------|-------------------------|----------------------------------|------------------------------|
| molecules<br>number    | 7148                    | 4372                             | 4563                         |
| m/z <sub>wa</sub> (Da) | 349.41                  | 338.54                           | 339.95                       |
| C <sub>wa</sub>        | 17.52                   | 16.99                            | 17.03                        |
| H <sub>wa</sub>        | 23.69                   | 23.26                            | 24.82                        |
| O <sub>wa</sub>        | 6.42                    | 6.23                             | 6.13                         |
| O/C <sub>wa</sub>      | 0.38                    | 0.37                             | 0.37                         |
| H/C <sub>wa</sub>      | 1.41                    | 1.42                             | 1.50                         |
| DBE <sub>wa</sub>      | 6.40                    | 6.06                             | 5.27                         |

57

58

59 Table S2  $AI_{\text{mod, wa}}$  index of DOM adsorbed by iron minerals before and after sunlight.

|                                             | $AI_{\text{mod, wa}}$ |
|---------------------------------------------|-----------------------|
| DOM adsorbed by goethite                    | 0.35                  |
| DOM adsorbed by ferrihydrite                | 0.31                  |
| DOM adsorbed by goethite after sunlight     | 0.024                 |
| DOM adsorbed by ferrihydrite after sunlight | -0.0016               |

60
